# Supplementary material
Source: PubMed Central journal article supplement (PMC7459267)

## Supplemental Tables and Figures

**Table S1. Summary of mouse leukemias analyzed in this study**

| Mouse ID | Sex | Age at euthanasia (weeks) | CD19 cells in thymus (per cent) | Health score at euthanasia <sup>a</sup> | Thymus weight (g) |
|----------|-----|---------------------------|---------------------------------|-----------------------------------------|-------------------|
| 406      | F   | 13.4                      | 96.5                            | 10                                      | 0.63              |
| 853      | M   | 20.6                      | 92.6                            | 5                                       | 0.07              |
| 854      | M   | 20.6                      | 97.3                            | 10                                      | 0.61              |
| 857      | M   | 20.6                      | 96.9                            | 5                                       | 0.21              |
| 968      | F   | 18.4                      | 97.7                            | 10                                      | 0.60              |
| 973      | F   | 18.1                      | 99.3                            | 10                                      | 0.64              |
| 856      | M   | 20.6                      | 86.6                            | 10                                      | 0.48              |
| 932      | M   | 14.3                      | 96.7                            | 5                                       | 0.24              |

<sup>a</sup>Health score of 10 indicates lethargy, piloerection and dyspnea. 5 indicates lethargy and/or piloerection.

**Table S2. Summary of whole exome sequencing analysis.**

| Mouse ID | Leukemia # Reads | Control # Reads | >0.1 SNVs (Strelka) | >0.1 SNVs (VarScan) | >0.1 SNVs (FreeBayes) | Gene Count >0.1 VAF MSSS (Strelka) | Gene Count >0.1 VAF MSSS (VarScan) | Gene Count >0.1 VAF MSSS (FreeBayes) | Gene Count (3 Callers) |
|----------|------------------|-----------------|---------------------|---------------------|-----------------------|------------------------------------|------------------------------------|--------------------------------------|------------------------|
| 406      | 60,500,407       | 59,438,806      | 412                 | 7140                | 47301                 | 73                                 | 248                                | 675                                  | 19                     |
| 853      | 67,958,871       | 67,817,215      | 399                 | 18389               | 258161                | 94                                 | 277                                | 1261                                 | 21                     |
| 854      | 68,410,460       | 63,035,473      | 578                 | 19918               | 274870                | 109                                | 353                                | 1434                                 | 24                     |
| 857      | 54,677,683       | 51,126,996      | 444                 | 19034               | 93623                 | 91                                 | 365                                | 1173                                 | 10                     |
| 968      | 57,551,810       | 59,980,031      | 335                 | 6999                | 50200                 | 64                                 | 236                                | 642                                  | 16                     |
| 973      | 75,511,794       | 58,495,688      | 273                 | 8885                | 28877                 | 40                                 | 208                                | 608                                  | 23                     |
| 856      | 65,397,737       | 64,757,981      | 343                 | 6742                | 53732                 | 57                                 | 248                                | 584                                  | 20                     |
| 932      | 53,180,631       | 63,388,629      | 440                 | 7171                | 24075                 | 73                                 | 311                                | 736                                  | 24                     |

SNV, single nucleotide variants. VAF, variant allele frequency. MSSS, missense, stop, start, and splice variants.

**Table S3. Summary of mutations identified in *Jak3*, *Jak1*, and *Ikzf3* genes.**

| Gene         | Mouse | CCF (Strelka) | CCF (VarScan) | CCF (FreeBayes) | Location | Base Change | Amino Acid Change | Effect           |
|--------------|-------|---------------|---------------|-----------------|----------|-------------|-------------------|------------------|
| <i>Jak3</i>  |       |               |               |                 |          |             |                   |                  |
| <i>Jak3</i>  | 853   | 0.509         | 0.508         | 0.515           | chr8     | C>T         | R653H             | Missense variant |
| <i>Jak3</i>  | 857   | 0.332         | 0.321         | 0.327           | chr8     | C>T         | T844M             | Missense variant |
| <i>Jak3</i>  | 406   | 0.401         | 0.379         | 0.396           | chr8     | C>T         | A568V             | Missense variant |
| <i>Jak3</i>  | 856   | 0.540         | 0.496         | 0.534           | chr8     | T>C         | V670A             | Missense variant |
| <i>Jak3</i>  | 968   | 0.483         | 0.447         | 0.478           | chr8     | C>T         | R653H             | Missense variant |
| <i>Jak1</i>  |       |               |               |                 |          |             |                   |                  |
| <i>Jak1</i>  | 854   | 0.255         | 0.223         | 0.257           | chr4     | C>A         | V657F             | Missense variant |
| <i>Jak1</i>  | 973   | 0.509         | 0.606         | 0.507           | chr4     | T>G         | F837V             | Missense variant |
| <i>Ikzf3</i> |       |               |               |                 |          |             |                   |                  |
| <i>Ikzf3</i> | 853   | 0.453         | 0.456         | 0.449           | chr11    | C>T         | H195Y             | Missense variant |
| <i>Ikzf3</i> | 857   | 0.552         | 0.541         | 0.547           | chr11    | C>T         | R137*             | Stop gained      |
| <i>Ikzf3</i> | 932   | 0.278         | 0.240         | 0.275           | chr11    | C>T         | R137*             | Stop gained      |

CCF, cancer cell frequency

**Table S4. Identities of Mice Included in Ruxolitinib Chow Experiment**

| Mouse ID | Ruxolitinib Chow | Sex | Age at euthanasia (weeks) | B-ALL          | RNA-seq | WES |
|----------|------------------|-----|---------------------------|----------------|---------|-----|
| 229      | None             | F   | 14.3                      | ✓              | ✓       | ✓   |
| 258      | None             | M   | 17.4                      | ✓              | ✓       | ✓   |
| 262      | None             | M   | 17.4                      | ✓              | ✓       | ✓   |
| 484      | None             | F   | 15.3                      | ✓              | ✓       | ✓   |
| 485      | None             | F   | 21.9                      | X <sup>a</sup> | ✓       | ✓   |
| 224      | 4-8 wk           | F   | 58.1                      | ✓              | X       | ✓   |
| 226      | 4-8 wk           | F   | 27.3                      | ✓              | ✓       | ✓   |
| 261      | 4-8 wk           | F   | 22.7                      | ✓              | ✓       | ✓   |
| 307      | 4-8 wk           | F   | 27.7                      | ✓              | ✓       | ✓   |
| 310      | 4-8 wk           | F   | 27.7                      | ✓              | ✓       | ✓   |
| 339      | 4-8 wk           | F   | 51.9                      | ✓              | X       | ✓   |
| 486      | 4-8 wk           | M   | 40.0                      | ✓              | ✓       | ✓   |

<sup>a</sup> determined to be other than B-ALL as indicated by low frequency CD19<sup>+</sup> cells and low frequency of pro-B cell specific gene expression.

**Table S5. Primer Sequences.**

| Gene  | Primer orientation | Oligonucleotide sequence         |
|-------|--------------------|----------------------------------|
| Tpb1  | FORWARD            | 5'- ACCGTGAATCTTGGCTGTAAC -3'    |
| Tpb1  | REVERSE            | 5'- GCAGCAAATCGCTTGGATTA -3'     |
| Gpx1  | FORWARD            | 5'- GTGTGGCCGATGTGTCTATT -3'     |
| Gpx1  | REVERSE            | 5'- GCGTTTCCTGTCTTTGTACTTTC -3'  |
| Cat   | FORWARD            | 5'- GATGGTAACTGGGATCTTGTGG -3'   |
| Cat   | REVERSE            | 5'- GTGGTTCCTCTCTGGCTATG -3'     |
| Neil1 | FORWARD            | 5'- CAGCCATTCCCTCCCTTCAGAAT -3'  |
| Neil1 | REVERSE            | 5'- TCCACACACCCACCCAAATAC -3'    |
| Sod2  | FORWARD            | 5'- CAGATTGCTGCCCTGCTCTAA -3'    |
| Sod2  | REVERSE            | 5'- CTGAAGGTAGTAAGCGTGCTC -3'    |
| Rad51 | FORWARD            | 5'- GGTTAGAGCAGTGTGGCATAA -3'    |
| Rad51 | REVERSE            | 5'- TAGTTCCTTCTTCGGTGCCATAAG -3' |

**Figure S1.** Mutational signature analysis. (A-H) Bar graphs indicate frequencies of variant types (in color, see legend) as well as trinucleotide context (x-axis) plotted against fraction (y-axis). Signatures identified by deconstructSigs are indicated above each graph.

**Figure S2.** Increased ROS in bone marrow cells in the absence of PU.1. Bone marrow cells from Spi-B-deficient (DB) or PU.1 and Spi-B-deficient (DPB) mice were placed in culture with IL-7 for one week followed by staining with H<sub>2</sub>DCEFDA and flow cytometric analysis. A) Shows one representative experiment. B) Shows mean and standard deviation of mean fluorescence intensity (MFI) from three independent experiments (unpaired Student's *t*-test).

**Figure S3.** Effect of Necrox-5 and ML334 on cell proliferation and gene expression of cultured leukemia cells. (A) Necrox-5 treatment reduces cell counts of cultured 973 cells in a dose-dependent manner. MTT assay was performed, and y-axis indicates absorbance at the indicated wavelength. P value was determined by ordinary one-way ANOVA of *n*=3 biological replicate experiments. (B) Gene expression analysis. RT-qPCR was performed to determine relative fold changes in the indicated mRNA transcripts after 24 hours of culture with Necrox-5. Statistical analysis was performed by one sample *t* and Wilcoxon test (*n*=5 biological replicate experiments). Error bars indicate standard error of the mean. (C) Reduced ROS in 973 cells treated for 24 hours with Necrox-5, as determined by H<sub>2</sub>DCEFDA staining. Numbers indicate mean fluorescence intensity (MFI). (D) ML334 treatment reduces cell counts of cultured 973 cells in a dose-dependent manner. Cell counting assays were performed, and y-axis indicates cell numbers. P value was determined by ordinary one-way ANOVA of *n*=3 biological replicate experiments. (E) Gene expression analysis. RT-qPCR was performed to

determine relative fold changes in the indicated mRNA transcripts after 24 hours of culture with ML334. Statistical analysis was performed by one sample t and Wilcoxon test ( $n=5$  biological replicate experiments). Error bars indicate standard error of the mean.

**Figure S4.** Mutational signatures of variants called by Varscan separated into VAF  $<0.3$  or VAF  $>0.3$ . (A) Weights of mutational signatures called using Strelka for leukemias from Mb1-Cre $\Delta$ PB mice fed with Control or Ruxolitinib (Ruxo) chow between 4-8 weeks of age. (B, C) Heat maps of mutational signatures in leukemias from Mb1-Cre $\Delta$ PB mice fed with Control or Ruxolitinib (Ruxo) chow between 4-8 weeks of age. Colors indicate weights of mutational signatures called by Varscan for WES results of leukemias separated into VAF  $<0.3$  (B) or VAF  $> 0.3$  (C).

# Figure S1

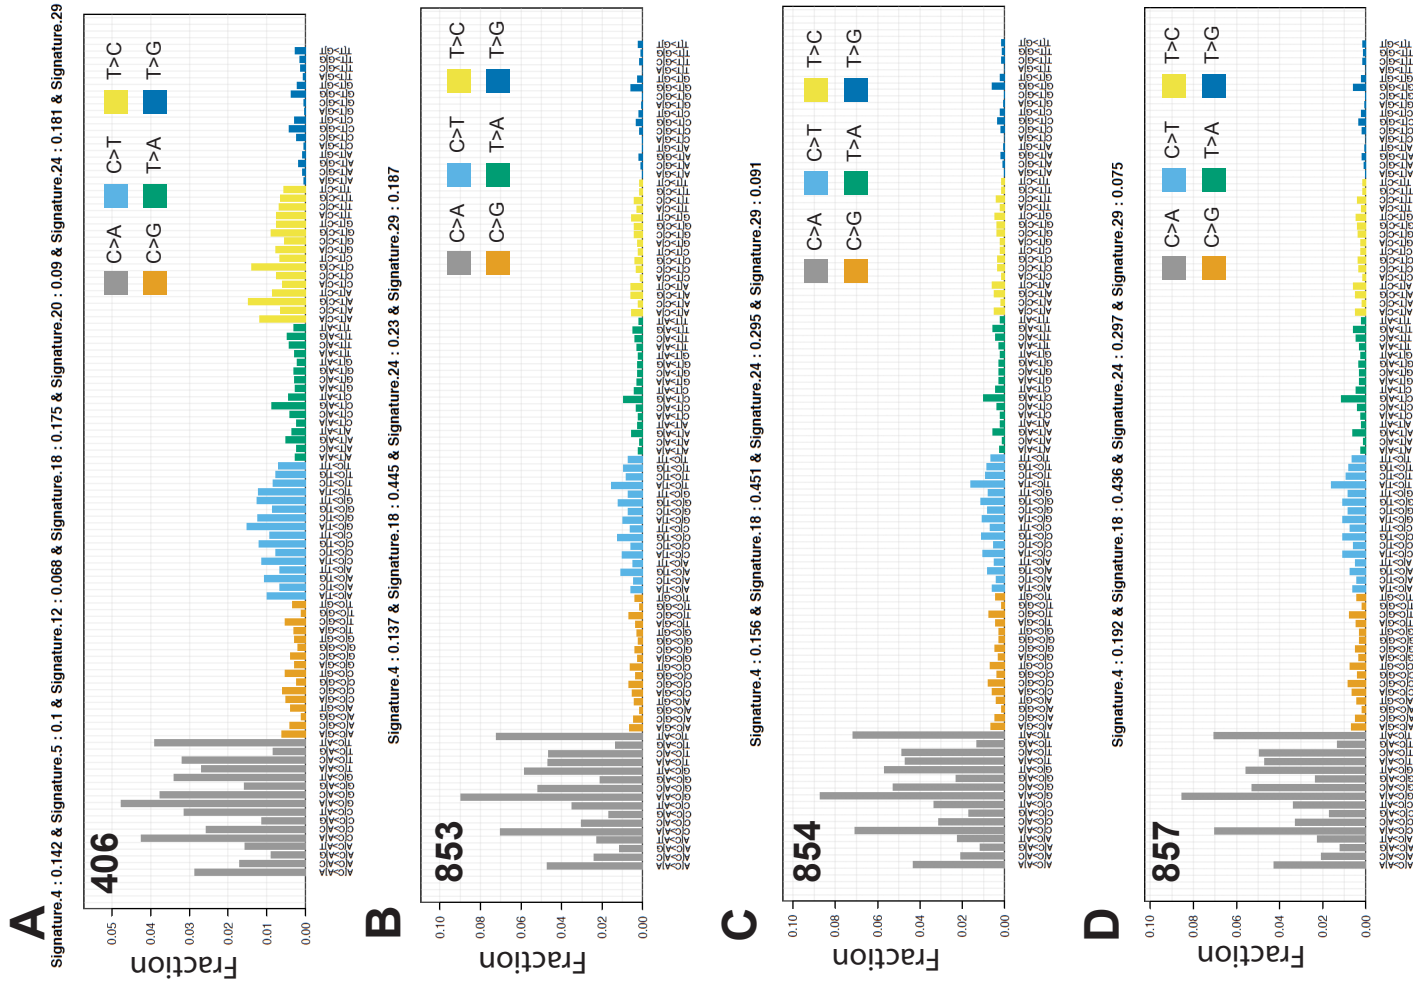



**Figure S2**

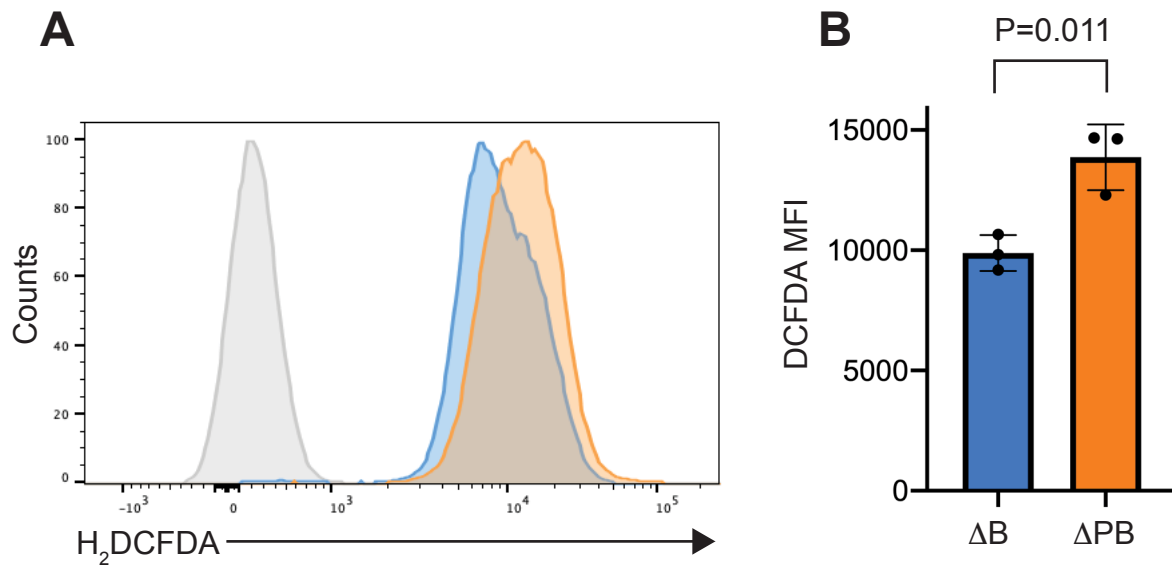

**Figure S3**

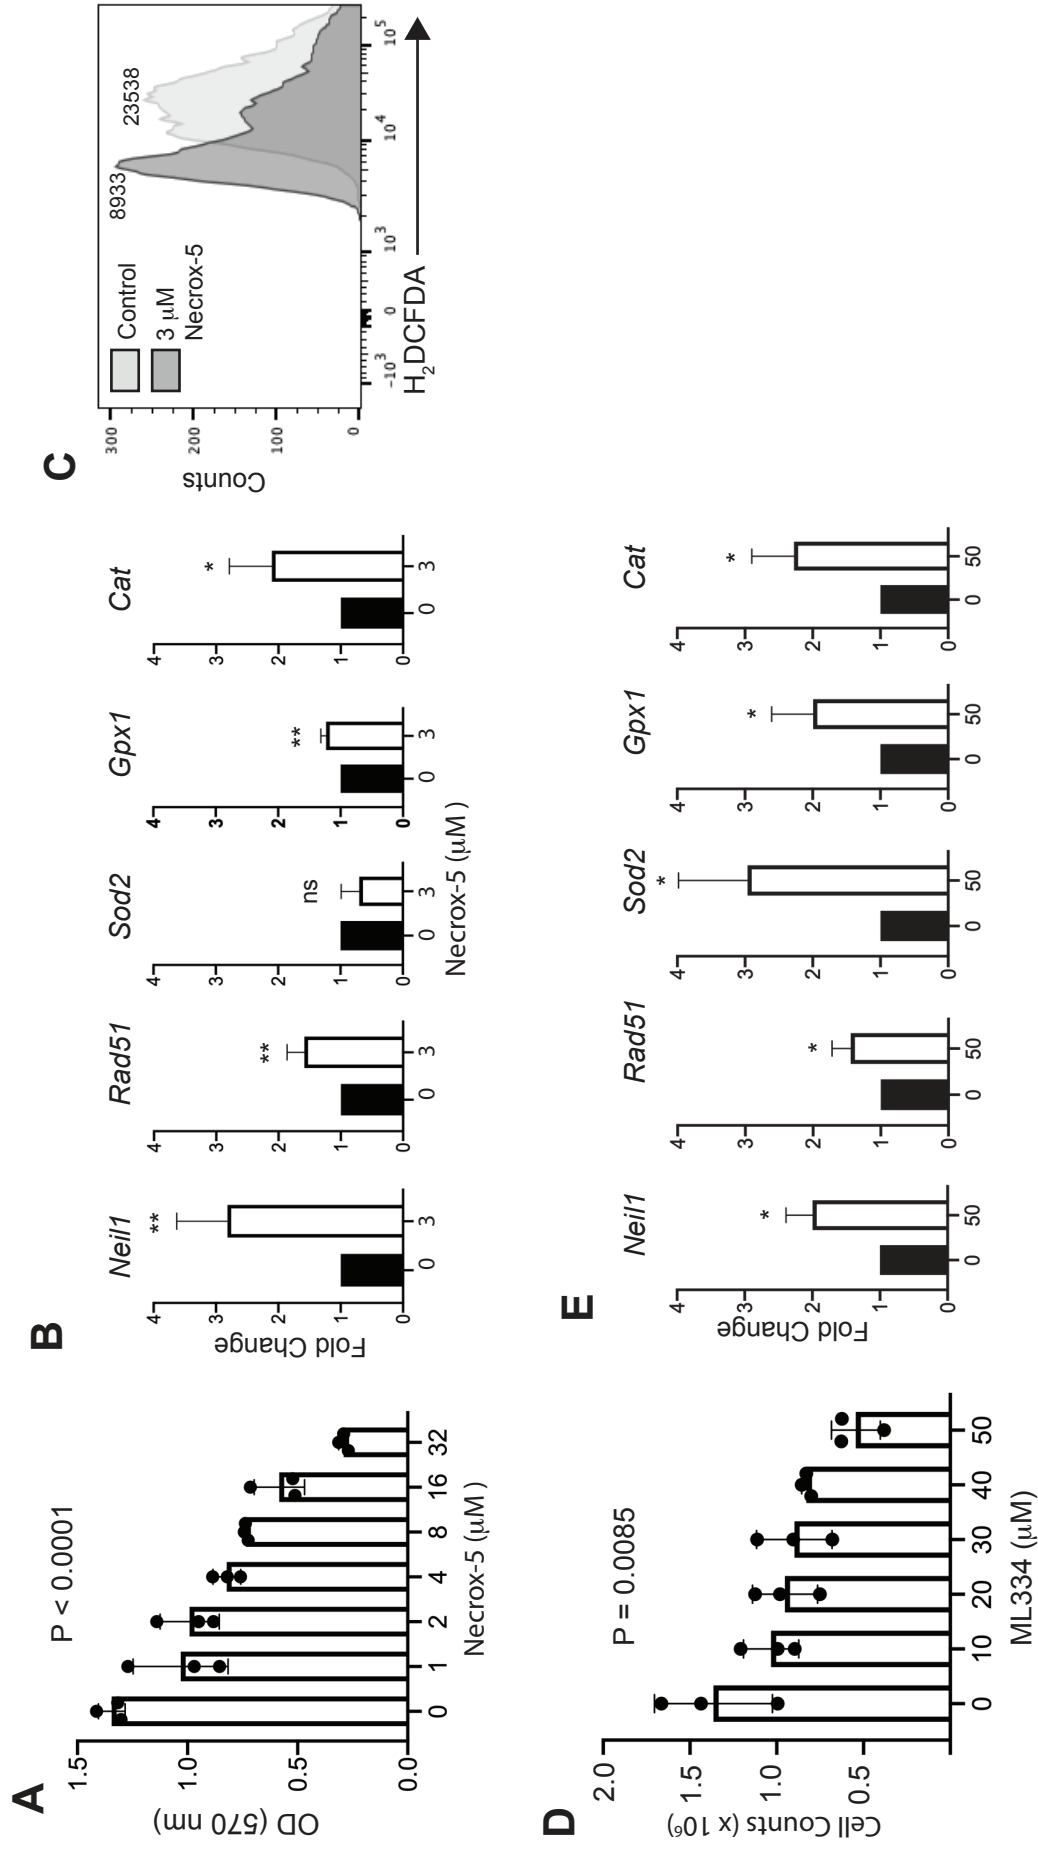

**Figure S4**

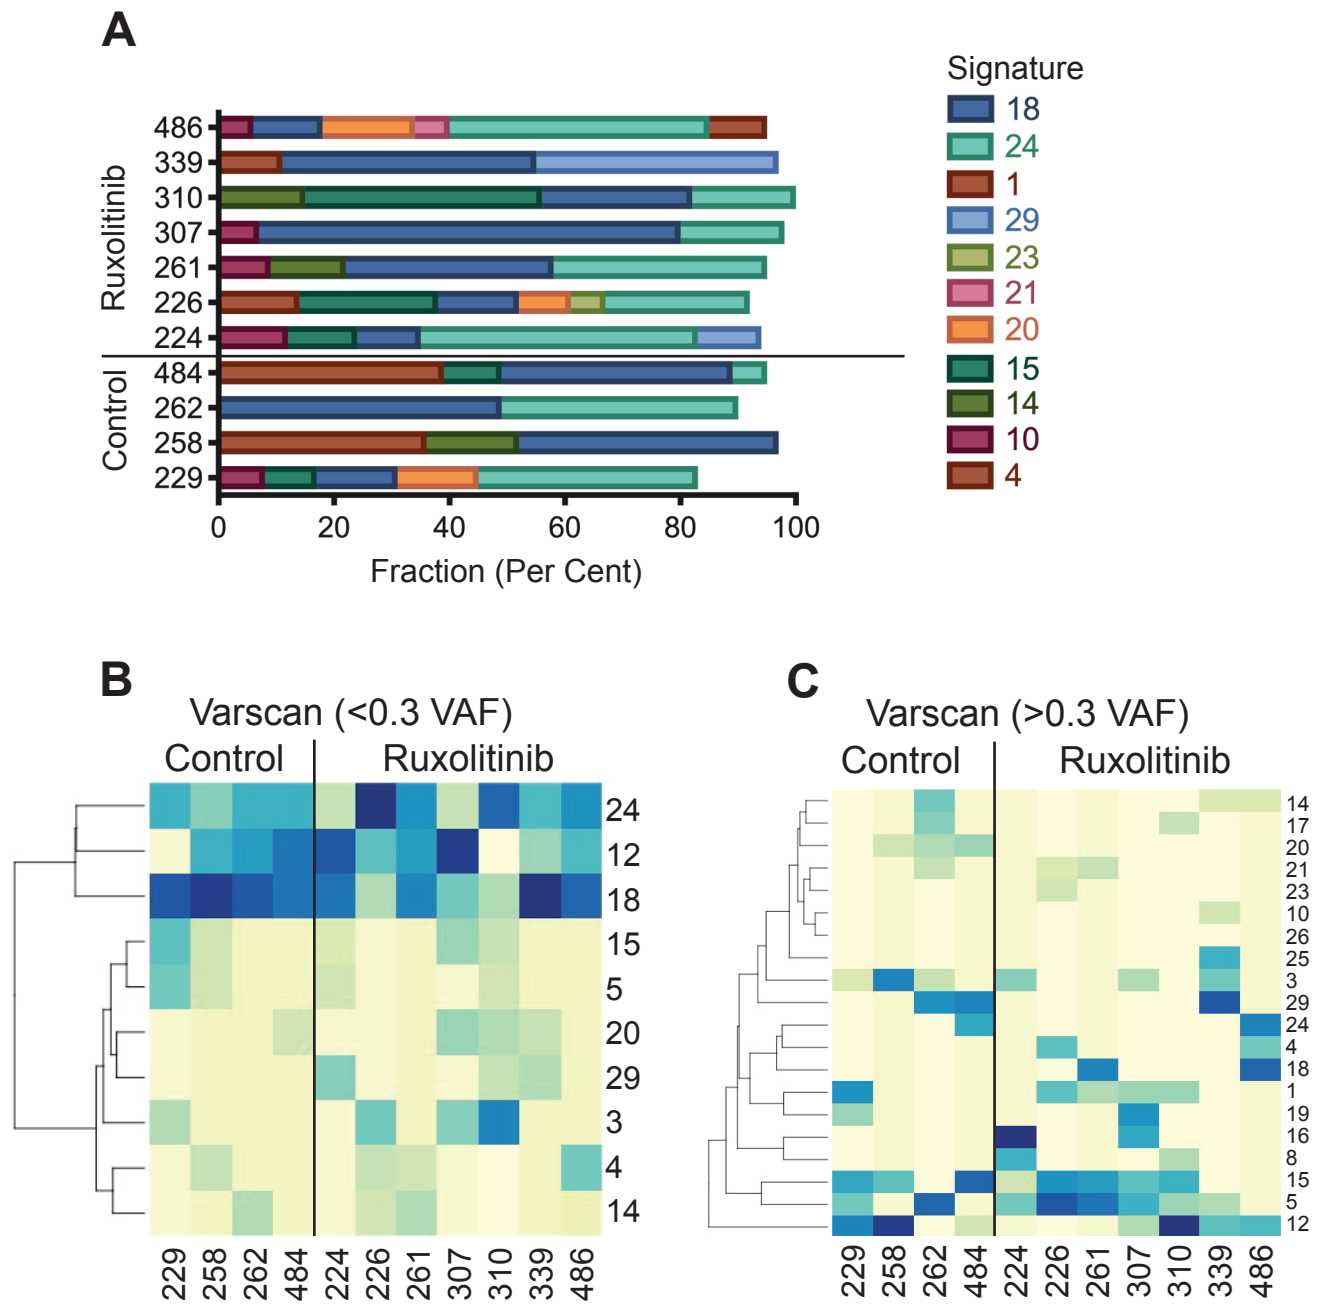

Supplement: MCB.00189-20-s0001.pdf [file MCB.00189-20-s0001.pdf]
